# Supplementary material for: Mental Health Service Utilization Rates Among Commercially Insured Adults in the US During the First Year of the COVID-19 Pandemic
Source: PubMed Central journal article supplement (PMC9857246; doi:10.1001/jamahealthforum.2022.4936), 2023-01-06
Supplement: jamahealthforum-e224936-s001.pdf [file jamahealthforum-e224936-s001.pdf]

## Data Sharing Statement

McBain. Mental Health Service Utilization Rates Among Commercially Insured Adults in the US During the First Year of the COVID-19 Pandemic. *JAMA Health Forum*. Published January 06, 2023. doi:10.1001/jamahealthforum.2022.4936

### Data

**Data available:** No
